# Supplementary material for: Cost-effectiveness of treatments for non-osteoarthritic knee pain conditions: A systematic review
Source: PubMed Central journal article supplement (PMC6300294; doi:10.1371/journal.pone.0209240), 2018-12-19
Supplement: pone.0209240.s002.pdf [file pone.0209240.s002.pdf]

## S1 Appendix: Search strategy in the applied databases

### PubMed:

((cost-benefit analysis[MeSH Terms]) OR (((((((((((((((economic evaluation) OR health economic) OR economic\* AND analysis) OR cost effect\*) OR cost-effect\*) OR cost-benefit\*) OR cost-utilit\*) OR cost utilit\*) OR cost consequence\* AND analysis) OR cost-consequence\* AND analysis) OR cost minimization analysis) OR cost-minimization analysis) OR economic\* AND aspect\*) OR health care cost\*) OR cost analysis))) AND (((((((patella) OR knee) OR knee joint)) AND ((Pain) OR Arthralgia))) OR (((patellofemoral pain syndrome) OR ("knee pain"[All Fields] OR "knee ache"[All Fields] OR "knee injury\*" [All Fields] OR "anterior cruciate ligament"[MeSH Terms] OR "anterior cruciate ligament injury\*" [All Fields] OR "knee fracture\*" [All Fields] OR "menisci, tibial"[MeSH Terms] OR "medial meniscus"[All Fields] OR "lateral meniscus injury\*" [All Fields])))

### Embase:

#3 #1 AND #2

#2 'knee pain'/de OR 'knee injury' OR arthralgia OR 'anterior cruciate ligament' OR 'anterior cruciate ligament injury' OR 'knee meniscus' OR 'knee meniscus rupture'

#1 'economic evaluation'/de OR 'cost effectiveness analysis':lnk OR 'cost utility analysis' OR 'cost benefit analysis' OR 'health economics' OR 'economic aspect' OR 'cost consequence analysis' OR 'cost minimization analysis' OR 'health care cost'

### NHS EED:

Search results [16 hits] Selected records [0 hits]

|                  |                                                  |     |
|------------------|--------------------------------------------------|-----|
| Any field        | <input type="text" value="knee pain"/>           | AND |
| Any field        | <input type="text" value="economic evaluation"/> | OR  |
| Author           | <input type="text"/>                             |     |
| Record date      | <input type="text"/> to <input type="text"/>     |     |
| Publication year | <input type="text"/> to <input type="text"/>     |     |

Cochrane:

|     |                                                            |
|-----|------------------------------------------------------------|
| #1  | MeSH descriptor: [Knee] explode all trees                  |
| #2  | knee pain                                                  |
| #3  | patellofemoral pain syndrome                               |
| #4  | anterior cruciate ligament injury                          |
| #5  | knee fracture                                              |
| #6  | meniscus tibial                                            |
| #7  | #1 or #2 or #3 or #4 or #5 or #6                           |
| #8  | MeSH descriptor: [Cost-Benefit Analysis] explode all trees |
| #9  | economic evaluation                                        |
| #10 | cost-effectiveness analysis                                |
| #11 | cost-utility analysis                                      |
| #12 | cost-minimization analysis                                 |
| #13 | cost-consequence analysis                                  |
| #14 | cost analysis                                              |
| #15 | #8 or #9 or #10 or #11 or #12 or #13 or #14                |
| #16 | #7 and #15                                                 |
