# Supplementary material for: Cost-effectiveness of treatments for non-osteoarthritic knee pain conditions: A systematic review
Source: PLoS One. 2018 Dec 19;13(12):e0209240. doi: 10.1371/journal.pone.0209240 (PMC6300294; doi:10.1371/journal.pone.0209240)
Supplement: S1 CHEC list — (XLSX) [file pone.0209240.s004.xlsx]

## Sheet: Ark1
Item number	Derrett et al		Elvidge et al		Genuario et al		Ramme et al		Mather III et al (Cost-Effectiveness Analysis of Early Reconstruction Versus Rehabilitation and Delayed Reconstruction for Anterior Cruciate Ligament Tears)		Paxton et al		Tan el al		Kiadaliri et al		Farshad et al		Rongen et al		Mather III et al (Societal and economic impact of anterior cruciate ligament tears)		Gerlier et al		Stewart el al		Gottlob et al		Bierbaum et al
1	Yes		Yes		Yes	They didn't discribe the age of the patient, charasteristics etc	Yes		Yes	The MOON study	Yes		Yes		Yes		Yes	They have hypothetically constructed patients with ACL based on a questionnaire, which was filled by experienced othopedic surgeons.	Yes		Yes		Yes		Yes		Yes		Yes
2	Yes		Yes		Yes		Yes		Yes		Yes	It does not state what single-bundle and double-bundle techniques are. They has not stated any reference either.	Yes		Yes		Yes		Yes		Yes		Yes		Yes		Yes		Yes
3	Yes		Yes		Yes		Yes		Yes		No	No comparator	Yes		No	The aim is not clearly stated	Yes		No	Not clearly bescribed	No		Yes		Yes		Yes		Yes
4	Yes		Yes		Yes		Yes		Yes		Yes		Yes		Yes		Yes		Yes		Yes		Yes		Yes		Yes	Functional status classification was created by the author meaning that the system is not validated.	Yes
5	No		Yes		No	The cycle time was 1 year, but because the procedures are surgical, a more longer time horizon would probably be relevant to include all costs and expecially outcomes.	Yes		No	Because the data was 6 years from the MOON and KANON studies.	No		No	The cost of the intervention can occur in the first year but the actual outcomes can first accur after longer time period.	No	Bruger within trial	No	The time horizon is 90 months which is not long enough to include all relevant outcomes and costs for the treatment options.	Yes		Yes		Yes		No		No		No	Only 3 year
6	No	Do not state the perspective of the economic evaluation	Yes		Yes		No	Health system perspective is not appropiate because the patients are adults and in workable age, which means that lost productivity cost shoud be included as well as patient costs such as medicin use.	Yes		Yes		Yes		Yes		No	Third payer party does not include all relevant costs associated with the treatment options including patient costs of medication and more importantly lost productivity as this has a huge impact on the cost-effectiveness of the treatment options.	Yes		Yes		Yes	Although productivity loss was not included, but they included a global healthcare payer perspective including patient payments	Yes		No	It is not clearly stated what the perspective of the model is used.	Yes
7	Yes		Yes		No	Since the perspective was societal, it would be appropiate to include lost productivity because the patients are young and probably active workers.	Yes		No	Societal costs included but they have not taken lost productivity into account. This is important to include as patients are adults and all in workable age.	No	Lost productivity and patient costs such as medication was not included	Yes		Yes		Yes		Yes		Yes		Yes		Yes	Although they have not included medication costs	No		Yes
8	Yes		Yes		Yes		Yes		Yes		Yes		Yes		Yes		Yes		Yes		Yes		Yes		Yes		No		Yes	Expert opinion of one cost input
9	Yes		Yes		Yes		Yes		Yes		Yes		Yes		Yes		No	The main costs are included based on expert opinions. This could mislead the actual costs of the treatment.	Yes		Yes		Yes		Yes	One cost was estimated by the author	No	The costs were estimated based on the senior authors private clinic. This could mislead the results and futhermore, the costs were based on one single clinic.	No	Based on data from 2012-2014 - not adjusted to reflect the same year or 2017 values when the study was published
10	Yes		Yes		Yes		Yes		Yes		Yes		Yes		Yes		Yes		Yes		Yes		Yes		Yes	SF-36 to EQ-5D	Yes		Yes
11	No		Yes	SF-36 data were mapped to EQ-5D	Yes		No	Assumptions were made and opinions were applied, which is not appropiate	Yes		Yes		Yes		Yes		No	The utilities are based four hypothetical patients which was constructed by expert opinions.	Yes		Yes		Yes		Yes		Yes		Yes
12	Yes		Yes		No	The event probabilities were identified from the literature, but the outcomes were measured with subjects in a sports medicine clinic. This could result in different health utilities not generalized to the population in the economic evaluation.	Yes		No	Some outcome values were estimated by expert opinion, which is not so optimal.	No	Expert opinions were used to correlate the states in a study to IKDC grades. They have used Gotlob et all from 1999 for utility values. This is an old study based on assumptions on quality of life. This does not reflect the actual quality of life from a patients perspective.	Yes		Yes		No		yes		No	Some of the utilities were based on expert opinion, which is not optimal.	Yes		Yes		No	It is not clear whether these subjects for which the questionnaires were sent to had ACL injury or if they were healthy participants.	No	SF 12 to SF6, but compared to literture retrieved utility values ; comparability discussable
13	Yes		Yes		Yes		Yes		Yes		Yes		Yes		Yes		Yes		Yes		Yes		Yes		Yes		Yes		Yes
14	No	Outcomes QALY should be discounted because it was estimated 2 years postoperative	Yes		Yes	Discounting not necessary because the time cycle was 1 year	Yes		Yes		Yes		Yes	Not necessary because the follow-up was less than one year	Yes		No	Discounting was necessary as the time horizon was 90 months (More than 1 year)	Yes		Yes		Yes	Effects were discounted with a rate of 1,5%.	Yes		Yes		No	Costs are discounted but not the outcomes
15	No	They have a small sample population, this should have been subjected to sensitivity analysis.	Yes		Yes		No		Yes		Yes		No		Yes		No		Yes		Yes		Yes		Yes		No		Yes
16	Yes		Yes		Yes		Yes		Yes		Yes		Yes		Yes		Yes		Yes		Yes		Yes		Yes		Yes		Yes	does not reflect on the high decision uncertainty of the analysis
17	No		Yes		Yes		Yes		Yes		No		Yes		Yes		No		No		No		No		No		Yes		No
18	No		No		Yes		Yes		No		Yes		No		Yes		Yes		Yes		Yes	They declare some sort of potential conflicts of interest.	No		Yes		No		No	funding recieved , but independence ensured
19	No		No	No, this might not be important and relevant for the study outcome.	No		No		No		No		No		No		No		No		No		No		No		No		No
Score yes (%)	0.58		0.89		0.79		0.79		0.74		0.68		0.79		0.84		0.53		0.84		0.79		0.84		0.84		0.53		0.68
